# Supplementary material for: Few-layer MoS2 nanosheets with and without silicon nanoparticles as anodes for lithium-ion batteries
Source: Royal Society of Chemistry journal article supplement (doi:10.1039/d2ta08886j), 2023-01-01
Supplement: d2ta08886j1.pdf [file d2ta08886j1.pdf]

Supplementary Information for:

## Few-layer MoS<sub>2</sub> nanosheets with and without silicon nanoparticles as anodes for lithium-ion batteries

Ifra Marriam<sup>ab\*</sup>, Mike Tebyetekerwa<sup>c</sup>, Hao Chen<sup>a</sup>, Hiran Chathuranga<sup>ab</sup>, Nunzio Motta<sup>bd</sup>, Jose A. Alarco<sup>bd</sup>, Zhen-Jiang He<sup>e</sup>, Jun-Chao Zheng<sup>e</sup>, Aijun Du<sup>bd</sup>, and Cheng Yan<sup>ab\*</sup>.

<sup>a</sup> School of Mechanical, Medical, and Process Engineering, Faculty of Engineering, Queensland University of Technology, 2 George Street, Brisbane, QLD 4000, Australia.

<sup>b</sup> Centre for Materials Science, Queensland University of Technology, 2 George Street, Brisbane, QLD 4000, Australia.

<sup>c</sup> Dow Centre for Sustainable Engineering Innovation, School of Chemical Engineering, The University of Queensland, St. Lucia, Brisbane, QLD 4072 Australia.

<sup>d</sup> School of Chemistry and Physics, Queensland University of Technology, 2 George Street, Brisbane, QLD 4000, Australia.

<sup>e</sup> School of Metallurgy and Environment, Central South University, Changsha, Hunan 410083, China.

\*Corresponding authors.

Email: [ifra.marriam@hdr.qut.edu.au](mailto:ifra.marriam@hdr.qut.edu.au) and [c2yan@qut.edu.au](mailto:c2yan@qut.edu.au)

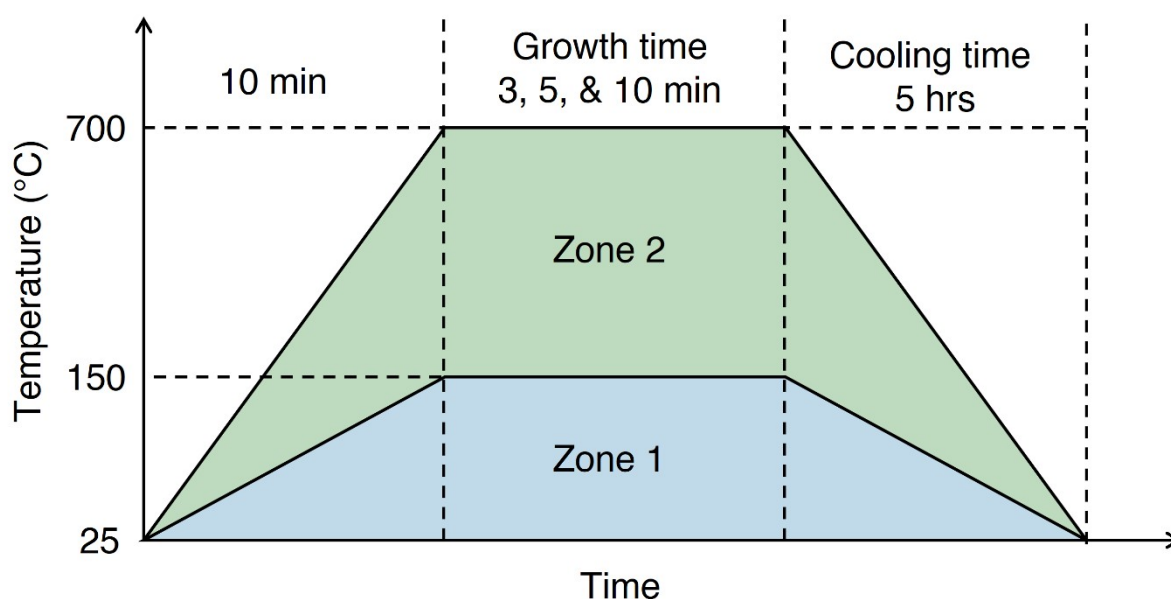

**Figure S1.** Temperature control during the growth of MoS<sub>2</sub> nanosheets. The CVD process of the MoS<sub>2</sub> took place in a two-zone furnace where the temperature of zone 1 was set to 150 °C for sulphur and zone 2 was set to 700 °C for MoO<sub>3</sub>/NaCl. To control the reaction and to prevent sulphur from evaporating before the reaction, the sulphur sample boat was placed away from the temperature zone so that it does not start melting immediately. Sulphur was then inserted into the heating area with the help of magnets once the temperature of zone 2 reached 700 °C. Once the temperatures of both zones reached the required values, the reaction took place and the temperatures were kept steady for 3, 5, and 10 minutes for MoS<sub>2</sub> growth to take place.

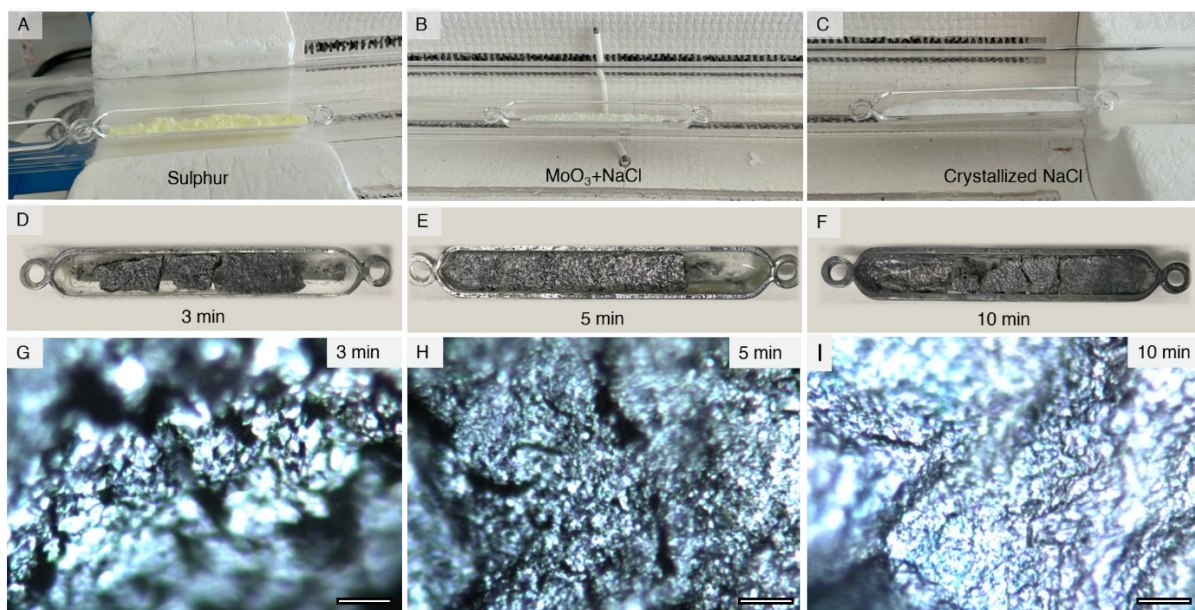

**Figure S2.** The photographs of the sample boats containing; (A) sulphur powder, (B) MoO<sub>3</sub>+NaCl, (C) crystallized NaCl before CVD and (D-F) MoS<sub>2</sub>@NaCl after CVD process. (G-I) Optical Images of MoS<sub>2</sub>@NaCl after CVD process (Scale bar = 25 μm).

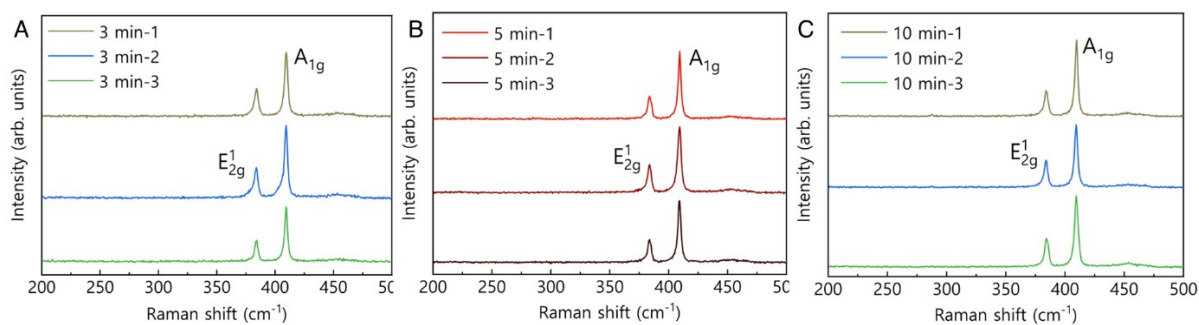

**Figure S3.** Raman spectroscopy of different samples after (A) 3 min, (B) 5 min, and (C) 10 min of growth time.

## Synthesis of MoS<sub>2</sub> on Si via CVD

In another setup, for a rapid process, we also attempted to grow MoS<sub>2</sub> nanosheets directly onto the Si nanoparticles. The Si powder was used as a substrate instead of NaCl in the CVD process. But the Si powder is very light in weight which tends to fly off during CVD with the gas flow. Even though we obtained low Raman intensity peaks, which confirmed the presence of MoS<sub>2</sub> on Si (Figure S4A), but there were no observable MoS<sub>2</sub> 2D nanosheets in the SEM images (Figure S4B and C). We attribute this to the smaller surface area of Si nanoparticles, which impedes the lengthwise growth of 2D MoS<sub>2</sub> nanosheets. Hence, the earlier prepared sandwiched heterostructure of MoS<sub>2</sub>@Si was the best option.

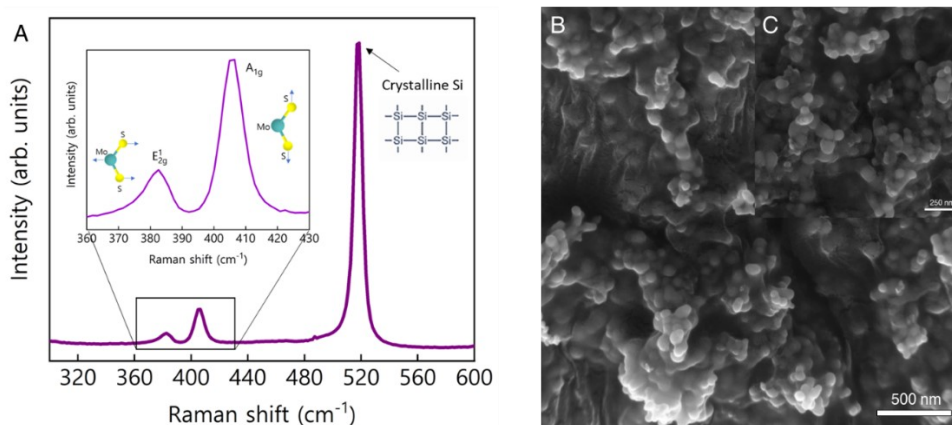

**Figure S4.** (A) Raman spectroscopy of MoS<sub>2</sub> on Si powder and (B) The SEM image of MoS<sub>2</sub> on Si powder with its zoom in (C).

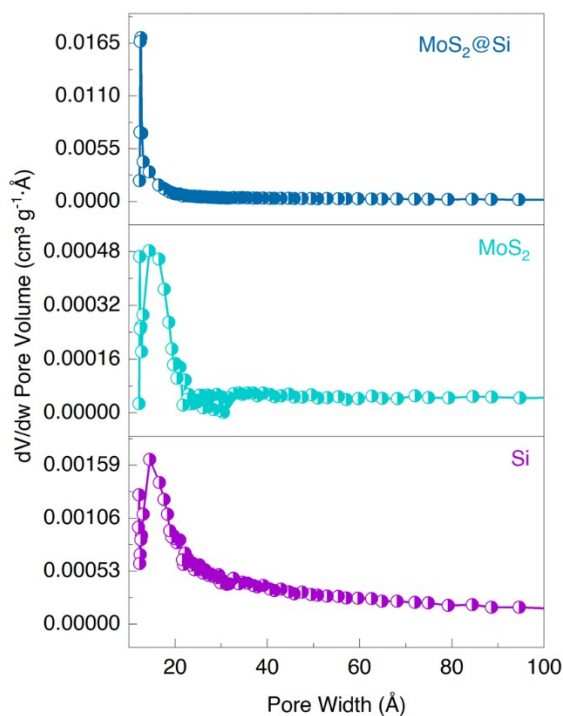

**Figure S5.** The pore size distribution of MoS<sub>2</sub>@Si, MoS<sub>2</sub>, and Si.

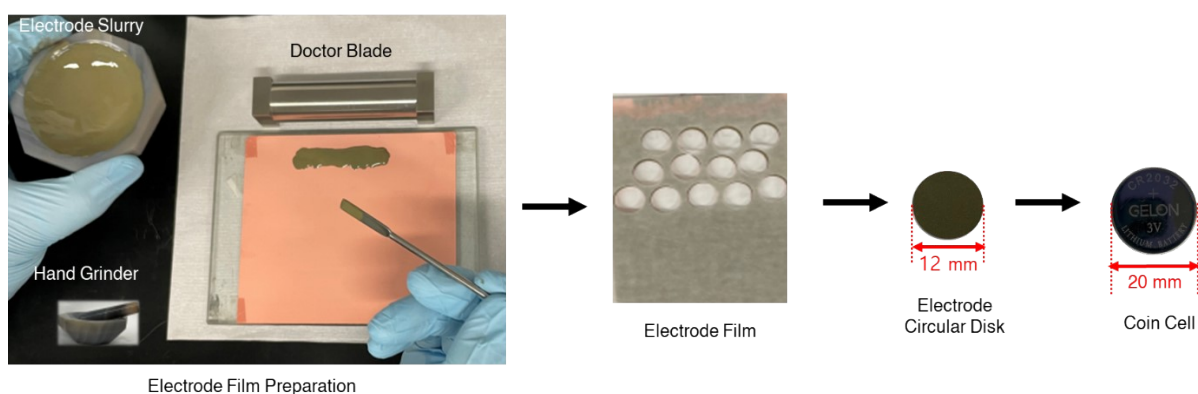

**Figure S6.** The photographs showing the preparation method of electrode slurry and coin cells for battery testing.

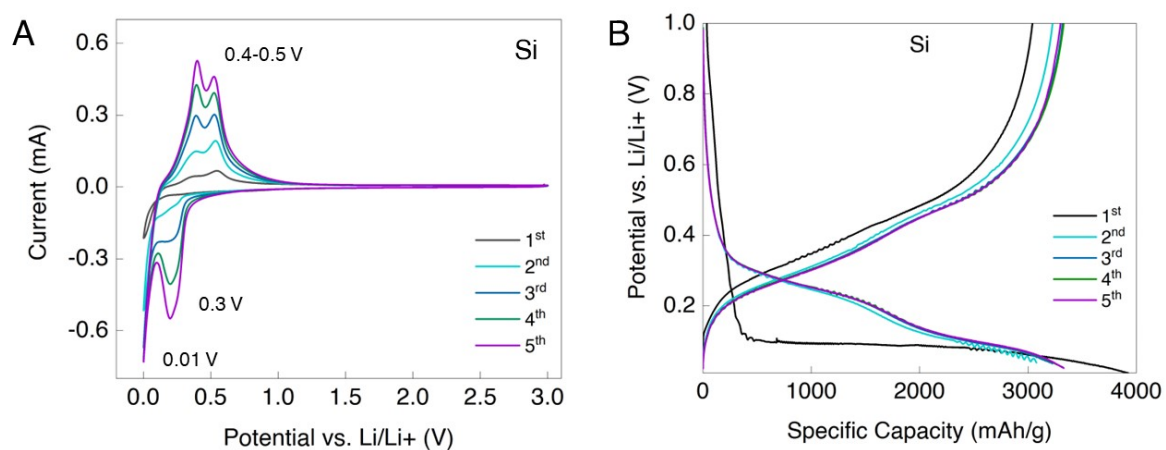

**Figure S7.** The electrochemical results. (A) CV curve of Si at a scan rate of 0.1 mV/s within the potential window of 0.01-3.0 V. (B) Galvanostatic charge/discharge profile of the initial five cycles for Si at 100 mA/g.

**Table S1.** The discharge and charge capacities of the MoS<sub>2</sub> and MoS<sub>2</sub>@Si electrodes at different current densities.

| Current Densities (mA/g) | MoS <sub>2</sub>             |                           | MoS <sub>2</sub> @Si         |                           |
|--------------------------|------------------------------|---------------------------|------------------------------|---------------------------|
|                          | Discharge Capacities (mAh/g) | Charge Capacities (mAh/g) | Discharge Capacities (mAh/g) | Charge Capacities (mAh/g) |
| 100                      | 890                          | 871                       | 2331                         | 2254                      |
| 200                      | 854                          | 830                       | 1865                         | 1744                      |
| 300                      | 820                          | 799                       | 1456                         | 1406                      |
| 500                      | 768                          | 746                       | 1087                         | 1065                      |
| 1000                     | 508                          | 454                       | 625                          | 612                       |
| 500                      | 668                          | 700                       | 1095                         | 1058                      |
| 300                      | 780                          | 779                       | 1231                         | 1193                      |
| 200                      | 856                          | 847                       | 1303                         | 1260                      |
| 100                      | 911                          | 904                       | 1707                         | 1658                      |

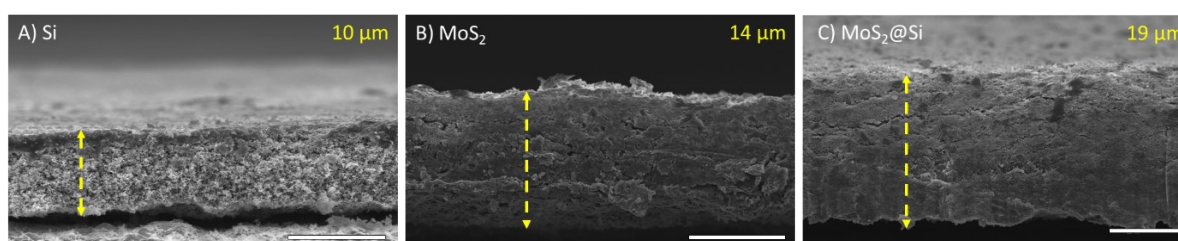

**Figure S8.** Cross-sectional SEM images of the electrodes before cyclic testing (scale bar= 10 μm).



**Table S2.** Comparison of volume expansion and electrochemical performance of Si anodes in Li-ion batteries.

| Materials                                             | Volume expansion (%) | Electrochemical Performance | No. Of cycles | Ref.      |
|-------------------------------------------------------|----------------------|-----------------------------|---------------|-----------|
| MoS <sub>2</sub> @Si                                  | 68                   | 993 mAh/g at 500 mA/g       | 500           | This work |
| Si/graphene                                           | 72                   | 714 mAh/g at 1000 mA/g      | 400           | 1         |
| Si-Cr <sub>3</sub> C <sub>2</sub> @few-layer graphene | 70                   | 881.8 mAh/g at 1000 mA/g    | 300           | 2         |
| SiO <sub>x</sub> /Lignin                              | 160                  | ~900 mAh/g at 200 mA/g      | 250           | 3         |
| Mesoporous Si/C microspheres                          | 85                   | 990 mAh/g at 100 mA/g       | 1000          | 4         |

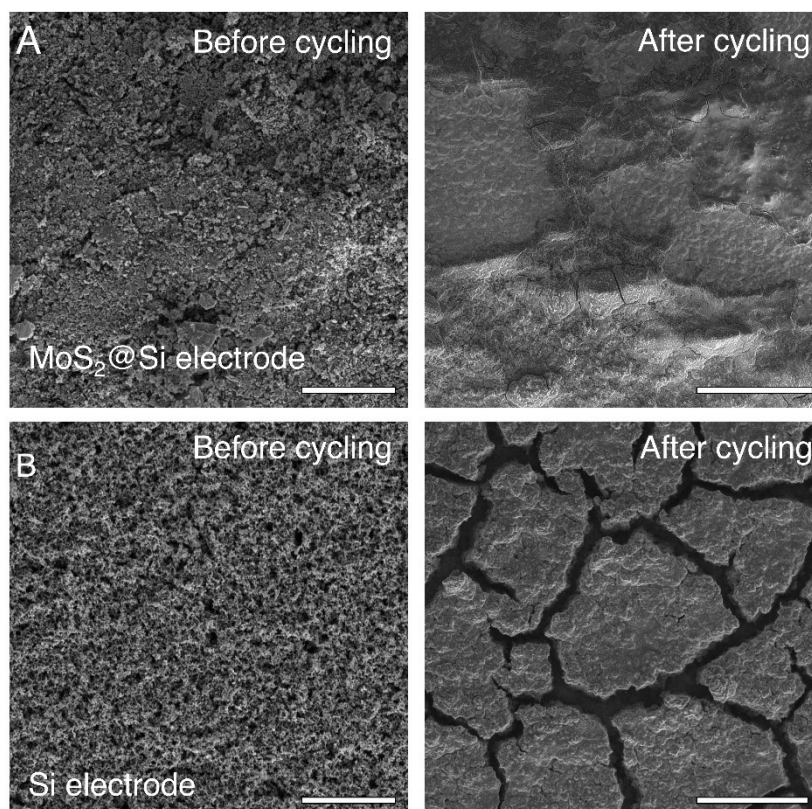

**Figure S9.** Ex-situ analysis of (A) MoS<sub>2</sub>@Si and (B) Si electrodes before and after cycling.

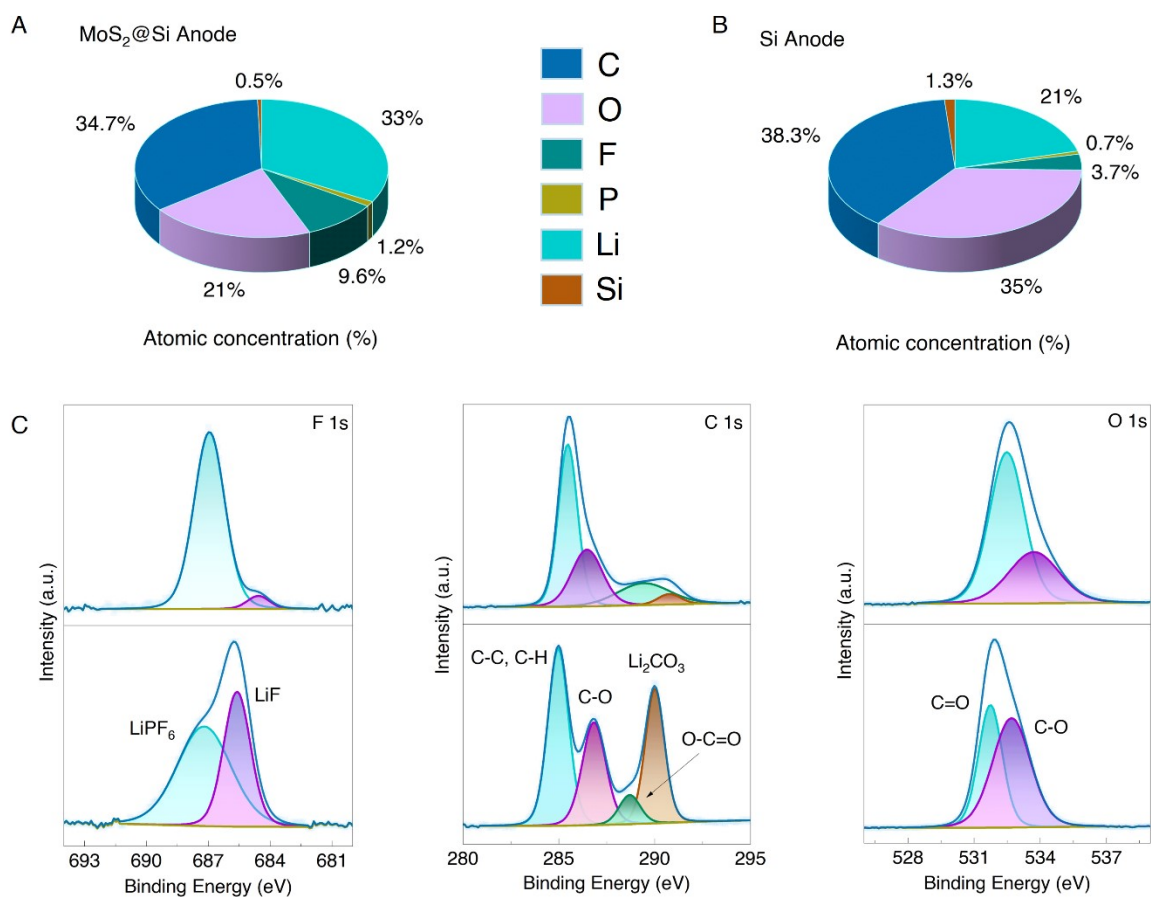

**Figure S10.** SEI analysis of Si and MoS<sub>2</sub>@Si anodes using XPS Spectra. Atomic concentrations of A) MoS<sub>2</sub>@Si and B) Si anodes after 500 cycles of charging/discharging at 500 mA/g. C) High-resolution XPS spectra of F 1s, C 1s, and O 1s. Si-top panel and MoS<sub>2</sub>@Si bottom panel.

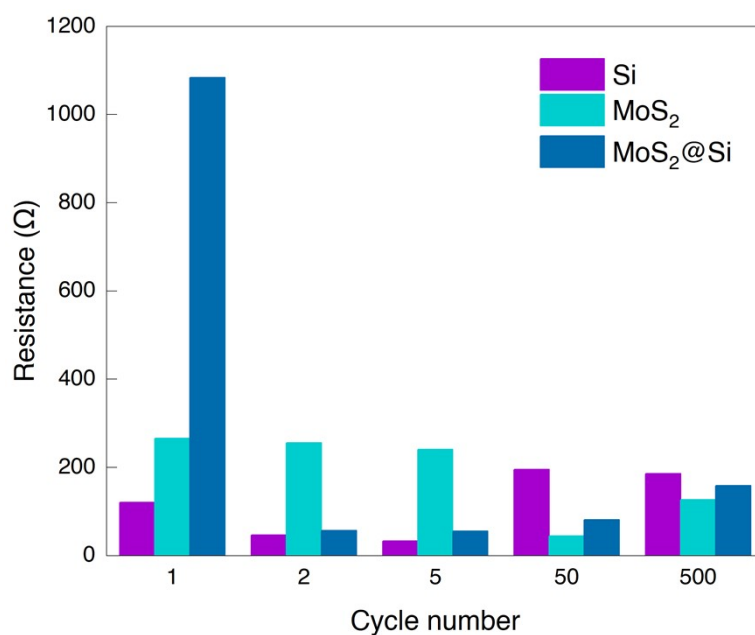

**Figure S11.** Evolution of the charge transfer resistance of the Si, MoS<sub>2</sub>, and MoS<sub>2</sub>@Si electrode from GCD discharge curves for cycles 1, 2, 5, 50, and 500 at 500 mA/g.

#### Supplementary Information References

1. H. Liu, W. Yang, S. Che, Y. Li, C. Xu, X. Wang, G. Ma, G. Huang and Y. Li, *Carbon*, 2022, **196**, 633-638.
2. Y. Liu, W. Sun, X. Lan, R. Hu, J. Cui, J. Liu, J. Liu, Y. Zhang and M. Zhu, *ACS Appl. Mater. Interfaces*, 2019, **11**, 38727-38736.
3. T. Chen, J. Hu, L. Zhang, J. Pan, Y. Liu and Y.-T. Cheng, *J. Power Sources*, 2017, **362**, 236-242.
4. Z.-L. Xu, Y. Gang, M. A. Garakani, S. Abouali, J.-Q. Huang and J.-K. Kim, *J. Mater. Chem. A*, 2016, **4**, 6098-6106.
